# Supplementary material for: PepMNet: a hybrid deep learning model for predicting peptide properties using hierarchical graph representations
Source: Royal Society of Chemistry journal article supplement (doi:10.1039/d4me00172a), 2024-12-11
Supplement: d4me00172a1.pdf [file d4me00172a1.pdf]

Supporting Information for :

## PepMNet: A Hybrid Deep Learning Model for Predicting Peptide Properties Using Hierarchical Graph Representations.

Authors: Daniel Garzon<sup>1</sup>, Omid Akbari<sup>1</sup>, Camille Bilodeau<sup>1,†</sup>

<sup>1</sup>University of Virginia, Chemical Engineering Department, 385 McCormick Road, Charlottesville, VA 22903

\*Corresponding Author: cur5wz@virginia.edu

†Permanent address: 385 McCormick Road, Charlottesville, VA 22903

### 1. Hyperparameter Tuning

For both models, we set the NNConv<sup>2,3</sup> layer so that we could incorporate atom and bond information at the atomic level, using sum as the aggregation function for neighborhood information and ReLU as the activation function. After hyperparameter tuning, we set 3 layers for the retention time (RT) model and 2 layers for the antimicrobial peptide (AMP) classification model. An ARMA<sup>4</sup> layer was chosen for both models at the residue level. This layer provided us the best model performance by setting NNConv at the atomic level, as shown **Figure 5** and **Supplementary Figure Table 6**. The tuning was performed manually and was not exhaustive, allowing us to explore several key hyperparameters.

For hyperparameter tuning on the retention time model, we selected a subset of 10,000 sequences randomly drawn from the misc dataset to streamline the process. The best hyperparameters were selected based on performance on the training set, while the testing set was reserved for evaluating final model performance. We experimented incorporating 1, 2, and 3 layers at the atomic level, using layer sizes of 500, 250, and 100, respectively. At the amino acid level, we tested 1 and 2 layers but observed significant overfitting with 2 layers. Once the ARMA layer was fixed at the amino acid level, we explored different configurations, including 7 and 3 stacks, with 3, 5, 7, and 10 layers each. Additionally, we experimented with dropout rates of 0, 0.1, and 0.5 in the ARMA layer, and examined the effects of sharing or not sharing weights between layers. The layer sizes tested included 100, 25, 10, and 15. The final ARMA layer configuration consisted of a layer size of 15, 3 stacks, 7 layers, no dropout, and no weight sharing between layers. At the peptide level, we explored various configurations of four linear layers with size combinations of (90, 50, 5, 1), (150, 50, 5, 1), (50, 50, 5, 1), and (100, 50, 5, 1), selecting the latter for the final model. We also evaluated different learning rates, including 1e-4, 1e-2, and 1e-3, along with batch sizes of 30, 20, and 25, ultimately settling on a learning rate of 1e-3 and a batch size of 25. Furthermore, multiple train/test splits were evaluated—specifically 6:4, 7:3, 8:2, and 9:1 selecting this last one with match we the split in from the previous state of the art work<sup>1</sup>. The final hyperparameter configuration that yielded the best results is summarized in Supplementary Table 1.

For AMP predictions, we split the dataset, using 80% for training and 20% for validation. The best hyperparameters were selected based on performance on the validation set. We experimented with binary cross-entropy combined with a final sigmoid layer, as well as binary cross-entropy with logits, ultimately selecting the latter. Additionally, we explored models with 1, 2, and 3 layers at the atomic level, using layer sizes of 1000, 250, 100, 20, 15, and 10. From these, we selected a two-layer configuration at the atomic level with sizes of 20 and 10. At the amino acid level, we tested one ARMA layer with different configurations, including 7 and 3 stacks, and layers with sizes of 3, 5, and 7. We also experimented with dropout rates of 0, 0.1, 0.2, and 0.3 in the ARMA layer, evaluating the impact of sharing or not sharing weights between layers. The final ARMA configuration included a layer size of 50, 3 stacks, 7 layers, a dropout rate of 0.3, and no weight sharing between layers. At the peptide level, we tested several configurations of four linear layers, including size combinations of (5, 0, 0, 1), (50, 100, 0, 1), (200, 150, 100, 1), (300, 150, 100, 1), and (200, 100, 10, 1), selecting the latter for the final model. We also explored different learning rates (1e-4, 5e-4, 5e-3, 1e-3) and batch sizes (25, 70, 100, 200, 300, 500), ultimately choosing a learning rate of 1e-3

and a batch size of 25. Finally, we tested weight decay values for regularization (1e-6, 1e-5, 1e-4), selecting 1e-5 as the final value. The optimal hyperparameter configuration that produced the best results for AMP classification is summarized in Supplementary Table 1.

**Table S1.** Final Hyperparameter Configuration

| Hyperparameter         | RT                | AMP                              |
|------------------------|-------------------|----------------------------------|
| Optimizer              | Adam              | Adam                             |
| Learning Rate          | 1e-3              | 1e-3                             |
| Loss Function          | Mean square error | Binary cross entropy with logits |
| Batch Size             | 25                | 100                              |
| Epochs                 | 100               | 500                              |
| Training Size          | 90%               | 80%                              |
| Atomic Layer 1         | 500               | 20                               |
| Atomic Layer 2         | 250               | 10                               |
| Atomic Layer 3         | 100               | -                                |
| Amino Acid Layer 1     | 15                | 50                               |
| Number Stacks          | 3                 | 3                                |
| Number Layers          | 7                 | 7                                |
| Shared Weights         | False             | False                            |
| Dropout-ARMA Layer     | 0                 | 0.3                              |
| Peptide Layer 1        | 100               | 200                              |
| Peptide Layer 2        | 50                | 100                              |
| Peptide Layer 3        | 10                | 10                               |
| Peptide Layer 4        | 1                 | 1                                |
| Dropout- Linear Layers | 0                 | 0                                |

The non-hierarchical models were designed with the same number of layers and parameters as PepMNet to ensure a fair comparison. Each graph convolutional layer had its own set of hyperparameters, and after tuning, the final configurations are provided in Supplementary Table 2.

**Table S2.** Hyperparameter Configuration Nonhierarchical Layers

| Layer           | Hyperparameters     |
|-----------------|---------------------|
| ARMA            | Stack = 3           |
|                 | Layers = 7          |
|                 | Dropout = 0.1       |
| EGConv          | Aggregation = Mean  |
|                 | Heads = 5           |
|                 | Bases = 2           |
| GAT             | Heads = 7           |
|                 | Concatenated = True |
|                 | Dropout = 0         |
| SAGEConv        | Aggregation = Mean  |
|                 | Normalize = True    |
|                 | Project = False     |
| TransformerConv | Heads = 3           |
|                 | Concatenated = True |
|                 | Beta = False        |
| GCNConv         | Normalize = True    |
|                 | Improved = False    |
|                 | Cached = False      |

## 2. Regression Task- Retention Time Prediction:

**Table S3.** R<sup>2</sup> Comparison for RT Prediction Using Different Graph Convolutional Layers at The Amino Acid Level for HeLa and misc Dataset.

| Dataset - Layer        | Amino Acid Feature - No Concatenated |        |        |        |        | Amino Acid Feature - Concatenated |               |               |               |        |
|------------------------|--------------------------------------|--------|--------|--------|--------|-----------------------------------|---------------|---------------|---------------|--------|
|                        | 1                                    | 2      | 3      | Avg    | Std    | 1                                 | 2             | 3             | Avg           | Std    |
| HeLa - ARMA            | 0.9597                               | 0.9444 | 0.9566 | 0.9536 | 0.0081 | <b>0.9625</b>                     | <b>0.9521</b> | <b>0.9553</b> | <b>0.9566</b> | 0.0053 |
| HeLa - EGConv          | 0.8743                               | 0.8245 | 0.8911 | 0.8633 | 0.0346 | 0.9123                            | 0.8529        | 0.9151        | 0.8934        | 0.0351 |
| HeLa - GAT             | 0.9231                               | 0.9335 | 0.8923 | 0.9163 | 0.0214 | 0.9473                            | 0.9425        | 0.9335        | 0.9411        | 0.0070 |
| HeLa - GCNConv         | 0.9559                               | 0.9628 | 0.9389 | 0.9525 | 0.0123 | 0.9468                            | 0.9429        | 0.9295        | 0.9397        | 0.0091 |
| HeLa - SAGEConv        | 0.8789                               | 0.8631 | 0.8434 | 0.8618 | 0.0178 | 0.8971                            | 0.8664        | 0.8929        | 0.8854        | 0.0166 |
| HeLa - TransformerConv | 0.9449                               | 0.9353 | 0.9601 | 0.9468 | 0.0125 | 0.8586                            | 0.8334        | 0.8442        | 0.8454        | 0.0127 |
| misc – ARMA            | 0.9848                               | 0.9872 | 0.9886 | 0.9869 | 0.0019 | <b>0.9880</b>                     | <b>0.9898</b> | <b>0.9892</b> | <b>0.9890</b> | 0.0010 |
| misc - EGConv          | 0.9513                               | 0.9461 | 0.9542 | 0.9505 | 0.0041 | 0.9542                            | 0.9536        | 0.9516        | 0.9531        | 0.0014 |
| misc - GAT             | 0.9506                               | 0.9496 | 0.9507 | 0.9503 | 0.0006 | 0.9439                            | 0.9457        | 0.9490        | 0.9462        | 0.0026 |
| misc - GCNConv         | 0.9516                               | 0.9529 | 0.9528 | 0.9524 | 0.0007 | 0.9547                            | 0.9540        | 0.9543        | 0.9543        | 0.0004 |
| misc - SAGEConv        | 0.9562                               | 0.9563 | 0.9564 | 0.9563 | 0.0001 | 0.9568                            | 0.9571        | 0.9563        | 0.9567        | 0.0004 |
| misc - TransformerConv | 0.9550                               | 0.9545 | 0.9561 | 0.9552 | 0.0008 | 0.9543                            | 0.9558        | 0.9548        | 0.9550        | 0.0008 |

**Table S4.** R<sup>2</sup> Performance of PepMNet

| PepMNet         | 1      | 2      | 3      | Avg           | Std    |
|-----------------|--------|--------|--------|---------------|--------|
| Atlantis Silica | 0.9809 | 0.9800 | 0.9816 | <b>0.9809</b> | 0.0008 |
| HeLa            | 0.9376 | 0.9463 | 0.9441 | <b>0.9427</b> | 0.0045 |
| Luna HILIC      | 0.9833 | 0.9829 | 0.9860 | <b>0.9841</b> | 0.0017 |
| Luna Silica     | 0.9773 | 0.9856 | 0.9857 | <b>0.9829</b> | 0.0048 |
| misc            | 0.9890 | 0.9879 | 0.9886 | <b>0.9885</b> | 0.0006 |
| SCX             | 0.9928 | 0.9950 | 0.9949 | <b>0.9942</b> | 0.0012 |
| Xbridge         | 0.9892 | 0.9886 | 0.9849 | <b>0.9876</b> | 0.0023 |
| yeast           | 0.9777 | 0.9837 | 0.9859 | <b>0.9825</b> | 0.0043 |

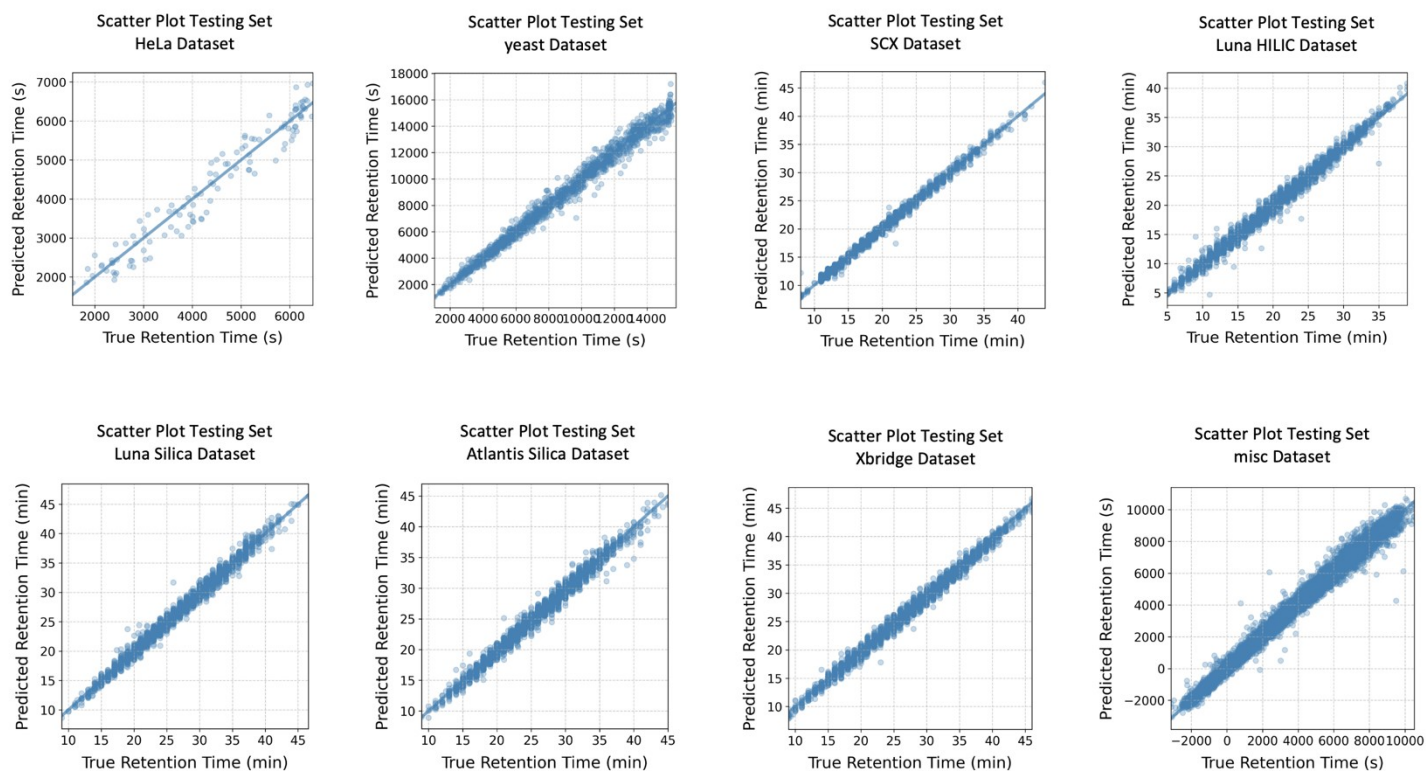

**Figure S1.** Scatter plots of retention time prediction on the test set across the eight different datasets.

**Table S5.**  $R^2$  Performance of Nonhierarchical Models with Atomic Level

| Dataset and Type of Layers<br>Nonhierarchical Atomic Level | 1      | 2      | 3      | Avg           | Std    |
|------------------------------------------------------------|--------|--------|--------|---------------|--------|
| Atlantis Silica-R2 Testing Using ARMA Layer                | 0.9792 | 0.9725 | 0.9791 | <b>0.9769</b> | 0.0039 |
| Atlantis Silica-R2 Testing Using EGConv Layer              | 0.9728 | 0.9745 | 0.9736 | <b>0.9736</b> | 0.0009 |
| Atlantis Silica-R2 Testing Using GAT Layer                 | 0.9704 | 0.9704 | 0.9712 | <b>0.9707</b> | 0.0005 |
| Atlantis Silica-R2 Testing Using GCNConv Layer             | 0.9720 | 0.9745 | 0.9745 | <b>0.9737</b> | 0.0014 |
| Atlantis Silica-R2 Testing Using NNConv Layer              | 0.9728 | 0.9697 | 0.9730 | <b>0.9718</b> | 0.0019 |
| Atlantis Silica-R2 Testing Using SAGEConv Layer            | 0.9752 | 0.9749 | 0.9750 | <b>0.9750</b> | 0.0002 |
| Atlantis Silica-R2 Testing Using TransformerConv Layer     | 0.9739 | 0.9719 | 0.9744 | <b>0.9734</b> | 0.0013 |
| HeLa-R2 Testing Using ARMA Layer                           | 0.7623 | 0.8456 | 0.8784 | <b>0.8288</b> | 0.0599 |
| HeLa-R2 Testing Using EGConv Layer                         | 0.8266 | 0.8264 | 0.8264 | <b>0.8265</b> | 0.0001 |
| HeLa-R2 Testing Using GAT Layer                            | 0.8348 | 0.8235 | 0.8302 | <b>0.8295</b> | 0.0057 |
| HeLa-R2 Testing Using GCNConv Layer                        | 0.8181 | 0.8169 | 0.8185 | <b>0.8178</b> | 0.0009 |
| HeLa-R2 Testing Using NNConv Layer                         | 0.9497 | 0.9500 | 0.9537 | <b>0.9511</b> | 0.0022 |
| HeLa-R2 Testing Using SAGEConv Layer                       | 0.8649 | 0.8391 | 0.8382 | <b>0.8474</b> | 0.0152 |
| HeLa-R2 Testing Using TransformerConv Layer                | 0.8556 | 0.8569 | 0.8571 | <b>0.8565</b> | 0.0008 |
| Luna Hilic-R2 Testing Using ARMA Layer                     | 0.9797 | 0.9797 | 0.9801 | <b>0.9798</b> | 0.0002 |
| Luna Hilic-R2 Testing Using EGConv Layer                   | 0.9728 | 0.9723 | 0.9715 | <b>0.9722</b> | 0.0006 |

|                                                      |        |        |        |               |        |
|------------------------------------------------------|--------|--------|--------|---------------|--------|
| Luna Hilic-R2 Testing Using GAT Layer                | 0.9706 | 0.9714 | 0.9719 | <b>0.9713</b> | 0.0006 |
| Luna Hilic-R2 Testing Using GCNConv Layer            | 0.9730 | 0.9727 | 0.9723 | <b>0.9727</b> | 0.0003 |
| Luna Hilic-R2 Testing Using NNConv Layer             | 0.9708 | 0.9724 | 0.9705 | <b>0.9712</b> | 0.0010 |
| Luna Hilic-R2 Testing Using SAGEConv Layer           | 0.9740 | 0.9739 | 0.9740 | <b>0.9739</b> | 0.0001 |
| Luna Hilic-R2 Testing Using TransformerConv Layer    | 0.9734 | 0.9731 | 0.9722 | <b>0.9729</b> | 0.0006 |
| Luna Silica-R2 Testing Using ARMA Layer              | 0.9724 | 0.9686 | 0.9787 | <b>0.9732</b> | 0.0051 |
| Luna Silica-R2 Testing Using EGConv Layer            | 0.9695 | 0.9713 | 0.9693 | <b>0.9700</b> | 0.0011 |
| Luna Silica-R2 Testing Using GAT Layer               | 0.9708 | 0.9715 | 0.9707 | <b>0.9710</b> | 0.0004 |
| Luna Silica-R2 Testing Using GCNConv Layer           | 0.9684 | 0.9663 | 0.9673 | <b>0.9673</b> | 0.0011 |
| Luna Silica-R2 Testing Using NNConv Layer            | 0.9710 | 0.9709 | 0.9707 | <b>0.9709</b> | 0.0002 |
| Luna Silica-R2 Testing Using SAGEConv Layer          | 0.9711 | 0.9724 | 0.9718 | <b>0.9718</b> | 0.0006 |
| Luna Silica-R2 Testing Using TransformerConv Layer   | 0.9723 | 0.9719 | 0.9723 | <b>0.9722</b> | 0.0002 |
| misc-R2 Testing Using ARMA Layer                     | 0.9584 | 0.9569 | 0.9471 | <b>0.9541</b> | 0.0061 |
| misc-R2 Testing Using EGConv Layer                   | 0.9414 | 0.9413 | 0.9413 | <b>0.9414</b> | 0.0001 |
| misc-R2 Testing Using GAT Layer                      | 0.9414 | 0.9416 | 0.9420 | <b>0.9417</b> | 0.0003 |
| misc-R2 Testing Using GCNConv Layer                  | 0.9401 | 0.9412 | 0.9407 | <b>0.9407</b> | 0.0005 |
| misc-R2 Testing Using NNConv Layer                   | 0.9412 | 0.9403 | 0.9414 | <b>0.9410</b> | 0.0006 |
| misc-R2 Testing Using SAGEConv Layer                 | 0.9428 | 0.9427 | 0.9426 | <b>0.9427</b> | 0.0001 |
| misc-R2 Testing Using TransformerConv Layer          | 0.9419 | 0.9419 | 0.9423 | <b>0.9420</b> | 0.0003 |
| SCX-R2 Testing Using ARMA Layer                      | 0.9931 | 0.9942 | 0.9942 | <b>0.9938</b> | 0.0006 |
| SCX-R2 Testing Using EGConv Layer                    | 0.9877 | 0.9873 | 0.9868 | <b>0.9872</b> | 0.0005 |
| SCX-R2 Testing Using GAT Layer                       | 0.9879 | 0.9868 | 0.9873 | <b>0.9873</b> | 0.0006 |
| SCX-R2 Testing Using GCNConv Layer                   | 0.9880 | 0.9846 | 0.9881 | <b>0.9869</b> | 0.0020 |
| SCX-R2 Testing Using NNConv Layer                    | 0.9869 | 0.9860 | 0.9865 | <b>0.9865</b> | 0.0005 |
| SCX-R2 Testing Using SAGEConv Layer                  | 0.9884 | 0.9885 | 0.9888 | <b>0.9886</b> | 0.0002 |
| SCX-R2 Testing Using TransformerConv Layer           | 0.9881 | 0.9825 | 0.9885 | <b>0.9864</b> | 0.0033 |
| Xbridge Amide-R2 Testing Using ARMA Layer            | 0.9827 | 0.9826 | 0.9820 | <b>0.9824</b> | 0.0004 |
| Xbridge Amide-R2 Testing Using EGConv Layer          | 0.9774 | 0.9776 | 0.9758 | <b>0.9769</b> | 0.0010 |
| Xbridge Amide-R2 Testing Using GAT Layer             | 0.9744 | 0.9749 | 0.9765 | <b>0.9752</b> | 0.0011 |
| Xbridge Amide-R2 Testing Using GCNConv Layer         | 0.9726 | 0.9743 | 0.9776 | <b>0.9748</b> | 0.0026 |
| Xbridge Amide-R2 Testing Using NNConv Layer          | 0.9778 | 0.9776 | 0.9753 | <b>0.9769</b> | 0.0014 |
| Xbridge Amide-R2 Testing Using SAGEConv Layer        | 0.9785 | 0.9729 | 0.9759 | <b>0.9758</b> | 0.0028 |
| Xbridge Amide-R2 Testing Using TransformerConv Layer | 0.9783 | 0.9776 | 0.9786 | <b>0.9782</b> | 0.0005 |
| yeast-R2 Testing Using ARMA Layer                    | 0.9346 | 0.9440 | 0.9435 | <b>0.9407</b> | 0.0053 |
| yeast-R2 Testing Using EGConv Layer                  | 0.9474 | 0.9444 | 0.9461 | <b>0.9460</b> | 0.0015 |
| yeast-R2 Testing Using GAT Layer                     | 0.9433 | 0.9477 | 0.9463 | <b>0.9457</b> | 0.0023 |
| yeast-R2 Testing Using GCNConv Layer                 | 0.8767 | 0.8803 | 0.8753 | <b>0.8774</b> | 0.0026 |
| yeast-R2 Testing Using NNConv Layer                  | 0.9429 | 0.9386 | 0.9400 | <b>0.9405</b> | 0.0022 |
| yeast-R2 Testing Using SAGEConv Layer                | 0.8972 | 0.9004 | 0.8979 | <b>0.8985</b> | 0.0017 |
| yeast-R2 Testing Using TransformerConv Layer         | 0.9439 | 0.9428 | 0.9419 | <b>0.9429</b> | 0.0010 |

**Table S6.** Performance of Nonhierarchical Models with Amino Acid Level

| Dataset and Type of Layers<br>Nonhierarchical Amino Acid Level | 1      | 2      | 3      | Avg           | Std    |
|----------------------------------------------------------------|--------|--------|--------|---------------|--------|
| Atlantis Silica-R2 Testing Using ARMA Layer                    | 0.8876 | 0.8905 | 0.8550 | <b>0.8777</b> | 0.0197 |
| Atlantis Silica-R2 Testing Using EGConv Layer                  | 0.9526 | 0.9523 | 0.9444 | <b>0.9498</b> | 0.0046 |
| Atlantis Silica-R2 Testing Using GAT Layer                     | 0.9506 | 0.9557 | 0.9480 | <b>0.9515</b> | 0.0039 |
| Atlantis Silica-R2 Testing Using GCNConv Layer                 | 0.9281 | 0.9302 | 0.9258 | <b>0.9281</b> | 0.0022 |
| Atlantis Silica-R2 Testing Using SAGEConv Layer                | 0.9760 | 0.9689 | 0.9669 | <b>0.9706</b> | 0.0048 |
| Atlantis Silica-R2 Testing Using TransformerConv Layer         | 0.9560 | 0.9470 | 0.9269 | <b>0.9433</b> | 0.0149 |
| HeLa-R2 Testing Using ARMA Layer                               | 0.6957 | 0.7995 | 0.7138 | <b>0.7363</b> | 0.0555 |

|                                                    |        |        |        |               |        |
|----------------------------------------------------|--------|--------|--------|---------------|--------|
| HeLa-R2 Testing Using EGConv Layer                 | 0.5696 | 0.5753 | 0.5459 | <b>0.5636</b> | 0.0156 |
| HeLa-R2 Testing Using GAT Layer                    | 0.5636 | 0.5619 | 0.5629 | <b>0.5628</b> | 0.0009 |
| HeLa-R2 Testing Using GCNConv Layer                | 0.4768 | 0.4768 | 0.4767 | <b>0.4768</b> | 0.0001 |
| HeLa-R2 Testing Using SAGEConv Layer               | 0.7912 | 0.7906 | 0.7911 | <b>0.7910</b> | 0.0003 |
| HeLa-R2 Testing Using TransformerConv Layer        | 0.8143 | 0.8160 | 0.8146 | <b>0.8150</b> | 0.0009 |
| Luna Hilic-R2 Testing Using ARMA Layer             | 0.8782 | 0.9064 | 0.8709 | <b>0.8852</b> | 0.0188 |
| Luna Hilic-R2 Testing Using EGConv Layer           | 0.9683 | 0.9677 | 0.9678 | <b>0.9679</b> | 0.0003 |
| Luna Hilic-R2 Testing Using GAT Layer              | 0.9409 | 0.9491 | 0.9533 | <b>0.9478</b> | 0.0063 |
| Luna Hilic-R2 Testing Using GCNConv Layer          | 0.9338 | 0.9322 | 0.9305 | <b>0.9322</b> | 0.0016 |
| Luna Hilic-R2 Testing Using SAGEConv Layer         | 0.9776 | 0.9754 | 0.9752 | <b>0.9760</b> | 0.0013 |
| Luna Hilic-R2 Testing Using TransformerConv Layer  | 0.9708 | 0.9717 | 0.9714 | <b>0.9713</b> | 0.0004 |
| Luna Silica-R2 Testing Using ARMA Layer            | 0.9101 | 0.7773 | 0.8411 | <b>0.8428</b> | 0.0664 |
| Luna Silica-R2 Testing Using EGConv Layer          | 0.9467 | 0.9478 | 0.9456 | <b>0.9467</b> | 0.0011 |
| Luna Silica-R2 Testing Using GAT Layer             | 0.9493 | 0.9500 | 0.9485 | <b>0.9493</b> | 0.0008 |
| Luna Silica-R2 Testing Using GCNConv Layer         | 0.8703 | 0.8763 | 0.8498 | <b>0.8654</b> | 0.0139 |
| Luna Silica-R2 Testing Using SAGEConv Layer        | 0.9701 | 0.9676 | 0.9729 | <b>0.9702</b> | 0.0027 |
| Luna Silica-R2 Testing Using TransformerConv Layer | 0.9555 | 0.9545 | 0.9545 | <b>0.9548</b> | 0.0006 |
| misc-R2 Testing Using ARMA Layer                   | 0.9565 | 0.9718 | 0.9476 | <b>0.9586</b> | 0.0122 |
| misc-R2 Testing Using EGConv Layer                 | 0.9419 | 0.9415 | 0.9371 | <b>0.9402</b> | 0.0027 |
| misc-R2 Testing Using GAT Layer                    | 0.9319 | 0.9357 | 0.9345 | <b>0.9341</b> | 0.0019 |
| misc-R2 Testing Using GCNConv Layer                | 0.9198 | 0.9191 | 0.9163 | <b>0.9184</b> | 0.0019 |
| misc-R2 Testing Using SAGEConv Layer               | 0.9487 | 0.9467 | 0.9478 | <b>0.9477</b> | 0.0010 |
| misc-R2 Testing Using TransformerConv Layer        | 0.9454 | 0.9448 | 0.9455 | <b>0.9452</b> | 0.0004 |
| SCX-R2 Testing Using ARMA Layer                    | 0.9349 | 0.9323 | 0.9303 | <b>0.9325</b> | 0.0023 |
| SCX-R2 Testing Using EGConv Layer                  | 0.9552 | 0.9740 | 0.9685 | <b>0.9659</b> | 0.0097 |
| SCX-R2 Testing Using GAT Layer                     | 0.9873 | 0.9853 | 0.9763 | <b>0.9830</b> | 0.0059 |
| SCX-R2 Testing Using GCNConv Layer                 | 0.9636 | 0.9656 | 0.9658 | <b>0.9650</b> | 0.0012 |
| SCX-R2 Testing Using SAGEConv Layer                | 0.9921 | 0.9916 | 0.9916 | <b>0.9918</b> | 0.0003 |
| SCX-R2 Testing Using TransformerConv Layer         | 0.9860 | 0.9893 | 0.9909 | <b>0.9888</b> | 0.0025 |
| Xbridge-R2 Testing Using ARMA Layer                | 0.9265 | 0.9322 | 0.9260 | <b>0.9282</b> | 0.0034 |
| Xbridge-R2 Testing Using EGConv Layer              | 0.9730 | 0.9653 | 0.9666 | <b>0.9683</b> | 0.0041 |
| Xbridge-R2 Testing Using GAT Layer                 | 0.9635 | 0.9557 | 0.9516 | <b>0.9569</b> | 0.0061 |
| Xbridge-R2 Testing Using GCNConv Layer             | 0.9273 | 0.9317 | 0.9159 | <b>0.9250</b> | 0.0081 |
| Xbridge-R2 Testing Using SAGEConv Layer            | 0.9784 | 0.9794 | 0.9801 | <b>0.9793</b> | 0.0008 |
| Xbridge-R2 Testing Using TransformerConv Layer     | 0.9469 | 0.9559 | 0.9470 | <b>0.9499</b> | 0.0052 |
| yeast-R2 Testing Using ARMA Layer                  | 0.9180 | 0.9294 | 0.9238 | <b>0.9237</b> | 0.0057 |
| yeast-R2 Testing Using EGConv Layer                | 0.8845 | 0.8806 | 0.8805 | <b>0.8819</b> | 0.0023 |
| yeast-R2 Testing Using GAT Layer                   | 0.8511 | 0.8646 | 0.8632 | <b>0.8597</b> | 0.0074 |
| yeast-R2 Testing Using GCNConv Layer               | 0.7370 | 0.7287 | 0.7442 | <b>0.7367</b> | 0.0077 |
| yeast-R2 Testing Using SAGEConv Layer              | 0.9451 | 0.9327 | 0.9409 | <b>0.9396</b> | 0.0063 |
| yeast-R2 Testing Using TransformerConv Layer       | 0.9144 | 0.9184 | 0.9186 | <b>0.9171</b> | 0.0024 |

### 3. Classification Task- Antimicrobial Peptide Prediction:

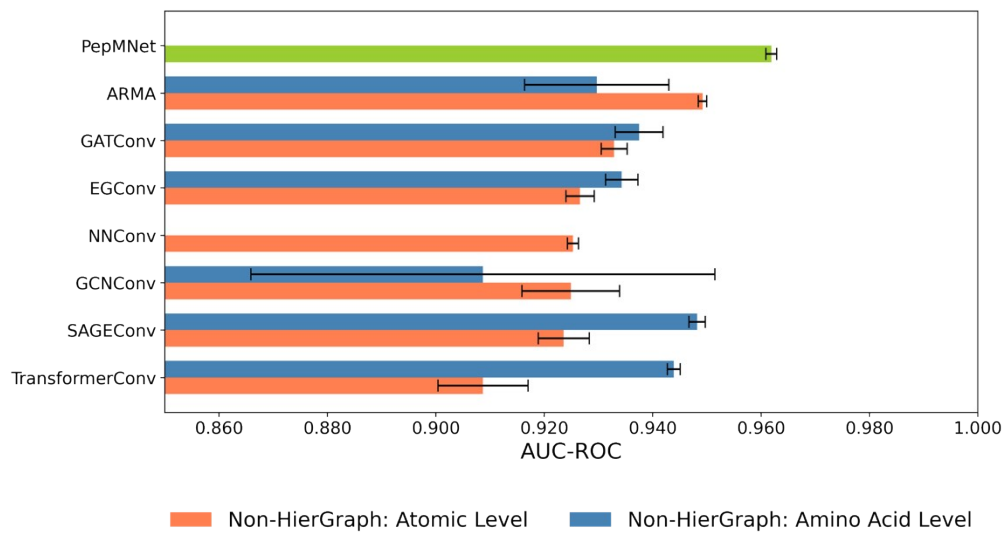

**Figure S2.** AUC Comparison Between PepMNet and Non-Hierarchical Models. The error bars are the standard deviation for the triplicate training implemented

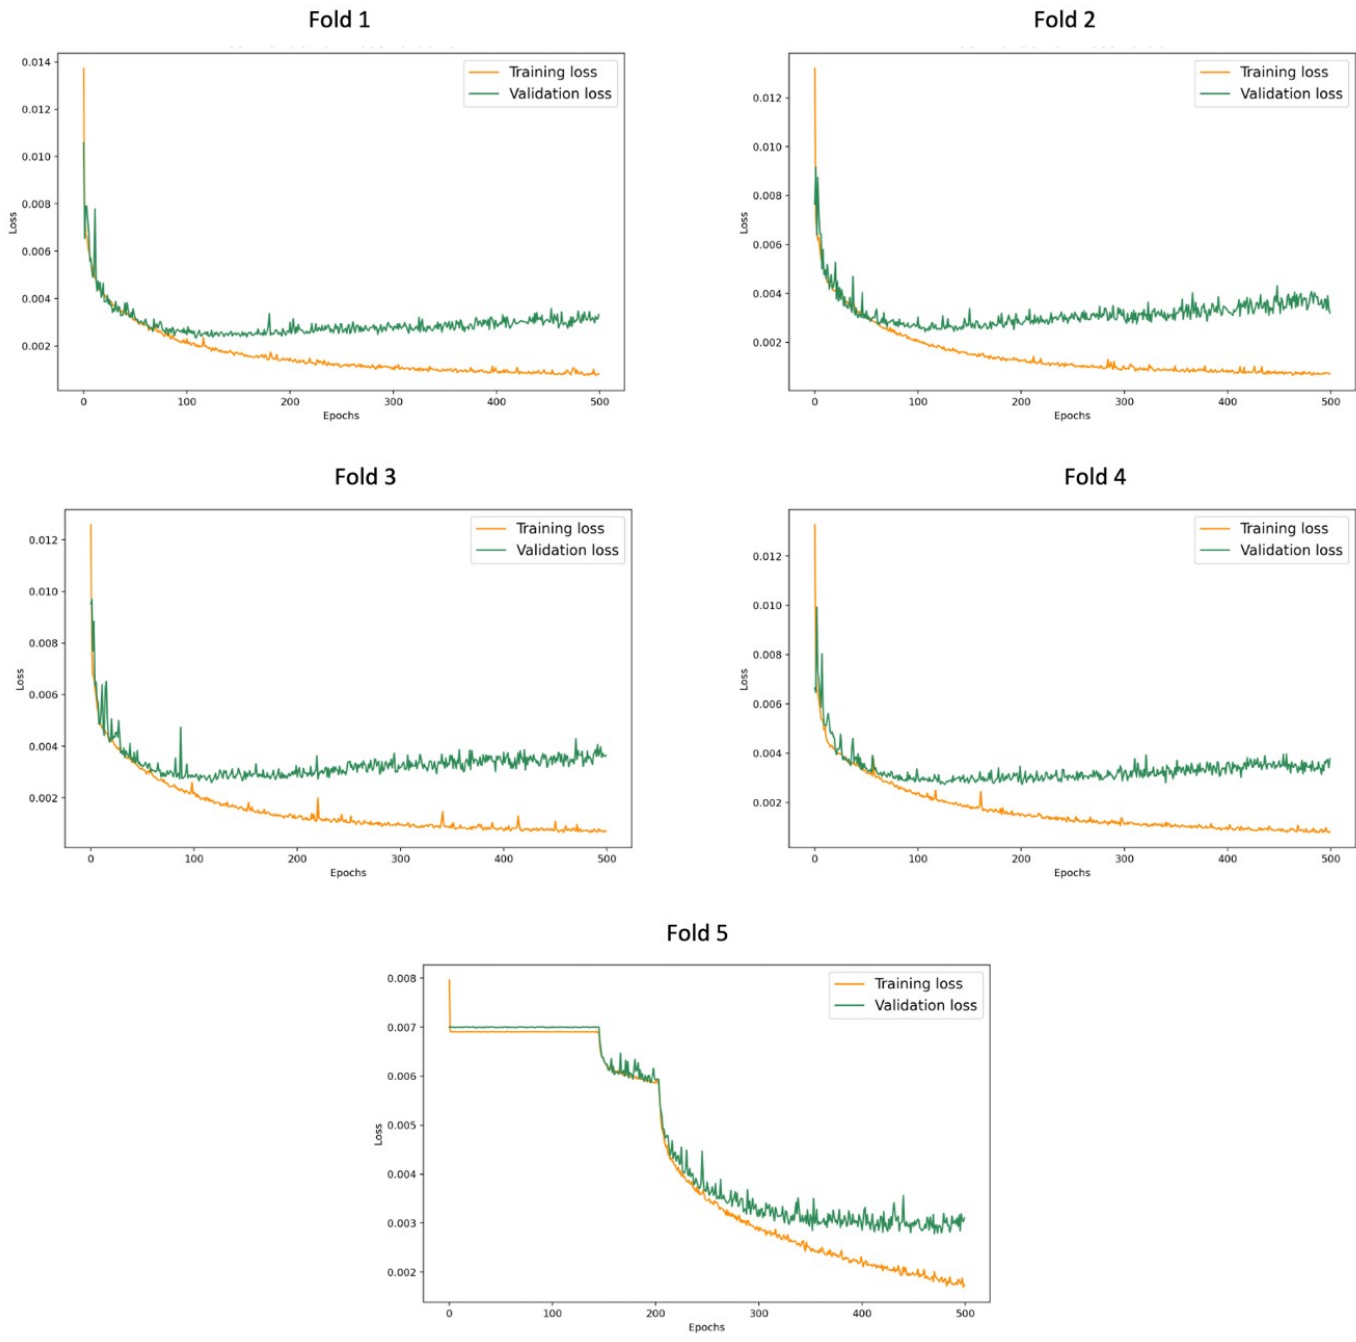

**Figure S3.** Loss Curves for Each Fold: Training and Validation Sets for Antimicrobial Classification



(a)

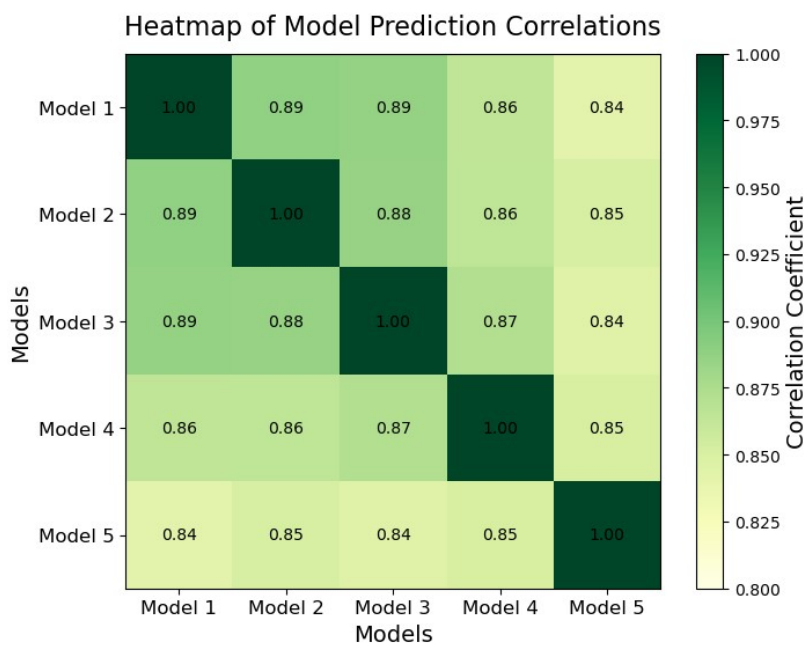

(b)

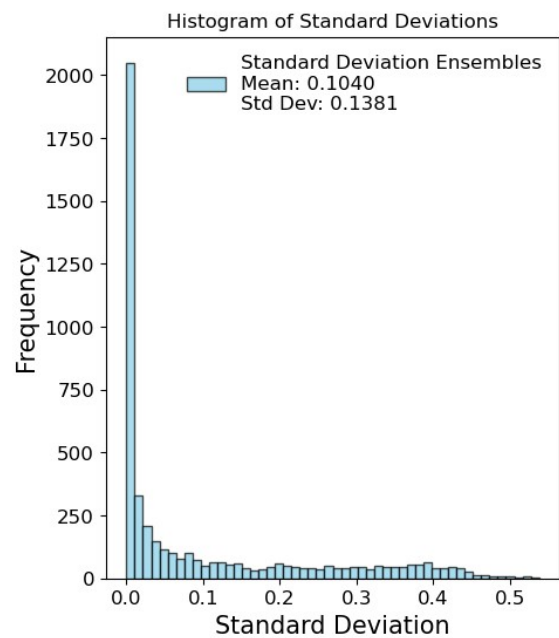

**Figure S4.** (a) Correlation Coefficient Between Model's Predictions for Each Fold (b) Distribution of the Standard Deviation of Predictions Across Folds
